# Supplementary material
Source: Springer Nature journal article supplement (https://www.springermedizin.de/resource/supplementary/12960_2011_311_MOESM3_ESM.pdf/9569782)

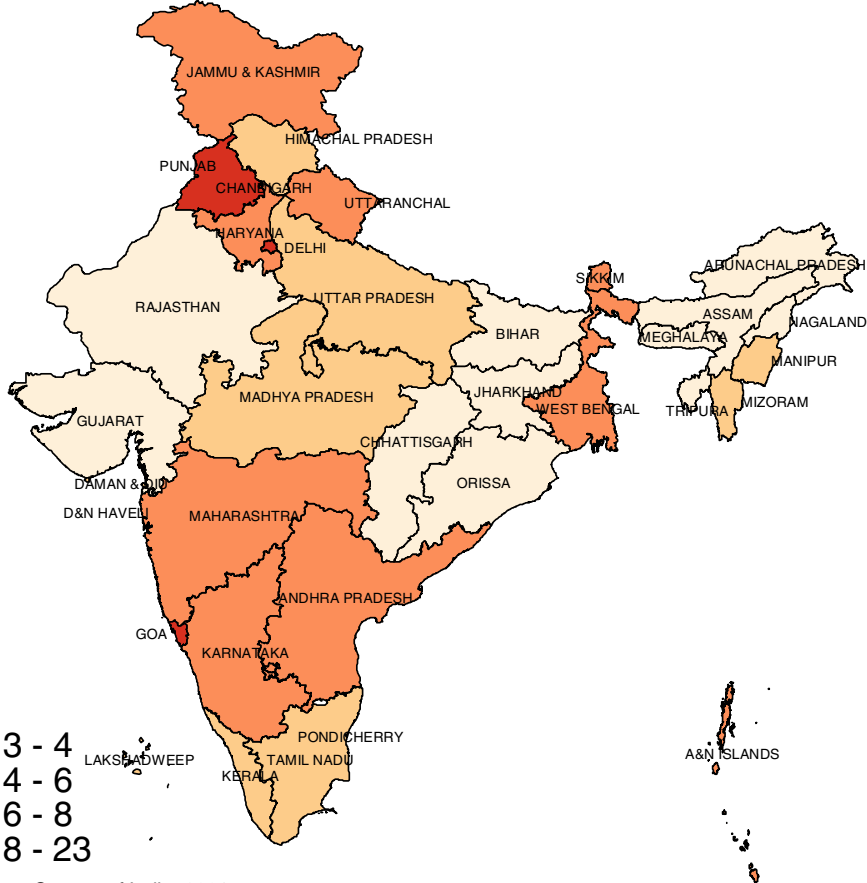

Source: Census of India, 2001

Supplement: MOESM3 [file 9569782]
